# Supplementary material
Source: PubMed Central journal article supplement (PMC3491968)
Supplement: supp_kws018_kws018_Web_Material.pdf [file supp_kws018_kws018_Web_Material.pdf]

## WEB APPENDIX

### *Case ascertainment*

This study was approved by the IRB at the Beth Israel Deaconess Medical Center (BIDMC). We identified consecutive patients  $\geq 21$  years of age admitted to the BIDMC between April 1, 1999, and October 31, 2008, with neurologist-confirmed ischemic stroke and residing in the Boston metropolitan region. Patients with in-hospital strokes or transient ischemic attacks were excluded. Trained abstractors recorded data on patient demographics, presenting symptoms and medical history from medical records. As in previous studies (1), we restricted our analysis to patients who lived within 40 km of the air pollution monitoring site to reduce exposure error. This analysis was limited to dates when data on constituents are available (January 1, 2003 to October 31, 2008).

### *Exposure assessment*

*PM<sub>2.5</sub> and particle constituents.* We obtained continuous measurements of PM<sub>2.5</sub> and daily (9AM-9AM) constituent concentrations from the Harvard–U.S. Environmental Protection Agency (EPA) Supersite in Boston, MA, located <1 km from the study site (2). PM<sub>2.5</sub> measured at this site is a strong proxy for personal exposure to ambient particles in communities surrounding Boston (3, 4). Where PM<sub>2.5</sub> data were missing (<10% of hourly measurements), levels were imputed using regression modeling, including a long-term time trend, day of week, hour of day, temperature, relative humidity, barometric pressure and nitrogen dioxide as predictors.

*Covariates.* Daily (9AM-9AM) meteorological data including temperature, relative humidity, and barometric pressure were calculated from the hourly surface observations of the National Weather Service First Order Station at Logan Airport.

### *Statistical analysis*

We used the time-stratified case-crossover study design (5, 6) to assess the association between ischemic stroke onset and levels of constituents in the 24 hours preceding each event. In this design, each subject's exposure prior to a case-defining event (case period) is compared with his or her exposure during periods when the subject did not become a case (control period). PM<sub>2.5</sub> levels during the 24 hours preceding each event were compared to levels on

other days of the same month and same day of the week as the case period. This design has been shown to effectively control for seasonality, time-trends, and chronic and slowly-varying potential confounders (7).

In all analyses, constituents were assessed relative to the time of stroke symptom onset. When the date of stroke onset is known but the time cannot be estimated (n=123), we assumed that symptom onset occurred at 9AM. We estimated the level of each constituent by taking a weighted average of the levels from the two days containing the 24 hours prior to stroke onset.

We performed conditional logistic regression stratifying on each hospitalization to obtain estimates of odds ratios (OR) and 95 percent confidence intervals (CI) associated with an interquartile-range increase in each constituent in separate models. Because of the sampling strategy, these OR's are unbiased estimates of the incidence rate ratio (IRR). We controlled for ambient temperature and dew point temperature using natural cubic splines (3 degrees of freedom each) and barometric pressure (linear continuous variable). We calculated estimates separately for the warm (April to November) and cold season (October to March). Analyses were performed using the R statistical package (R v 2.8.1) (8).

## References

1. Wellenius GA, Burger M, Coull BA, et al. Ambient Air Pollution and the Risk of Acute Ischemic Stroke. *Arch Intern Med* In Press.
2. Madrigano J, Baccarelli A, Mittleman MA, et al. Prolonged exposure to particulate pollution, genes associated with glutathione pathways, and DNA methylation in a cohort of older men. *Environ Health Perspect* 2011;119(7):977-82.
3. Sarnat JA, Brown KW, Schwartz J, et al. Ambient gas concentrations and personal particulate matter exposures: implications for studying the health effects of particles. *Epidemiology* 2005;16(3):385-95.
4. Sarnat SE, Coull BA, Schwartz J, et al. Factors affecting the association between ambient concentrations and personal exposures to particles and gases. *Environ Health Perspect* 2006;114(5):649-54.
5. Levy D, Lumley T, Sheppard L, et al. Referent selection in case-crossover analyses of acute health effects of air pollution. *Epidemiology* 2001;12(2):186-92.
6. Lumley T, Levy D. Bias in the case-crossover design: implications for studies of air pollution. *Environmetrics* 2000;11:689-704.
7. Schwartz J, Zanobetti A, Bateson TF. Morbidity and mortality among elderly residents in cities with daily PM measurements. *Revised Analyses of Time-Series Studies of Air Pollution and Health Special Report*. Boston: Health Effects Institute, 2003:25-58.
8. R Development Core Team. R: A language and environment for statistical computing. Vienna, Austria: R Foundation for Statistical Computing, 2008.

**Web Table 1.** Incidence Rate Ratio and 95% Confidence Intervals for the Association between an IQR Increase in Constituent Proportion and Ischemic Stroke Onset in the following 24 Hours.

| <b>Constituent</b> | <b>Incidence Rate Ratio</b> | <b>95% Confidence Interval</b> |
|--------------------|-----------------------------|--------------------------------|
| Silicon            | 0                           | 0, 9.16E+03                    |
| Chlorine           | 0.67                        | 0, 1.04E+03                    |
| Potassium          | 6.03                        | 0, 3.22E+05                    |
| Manganese          | 0                           | 3.31E-322, 9.48E+85            |
| Zinc               | 0                           | 0, 2.27E+23                    |
| Sodium             | 0                           | 0, 6.10                        |
| Copper             | 0                           | 0, 7.45E+106                   |
| Aluminum           | 0                           | 0, 2.88E+12                    |
| Calcium            | 0                           | 0, 1.03E+13                    |
| Bromine            | 9.814E+22                   | 0, 1.23E+293                   |
| Lead               | 1.371E+09                   | 0, 3.51E+192                   |
| Selenium           | 0                           | 0, 3.03E+287                   |
| Titanium           | 0                           | 0, 1.67E+168                   |
| Vanadium           | 7.535E+55                   | 0, 3.18E+176                   |
| Iron               | 0                           | 0, 9.77E+06                    |
| Sulfur             | 0.53                        | 0, 21.74                       |
| Nickel             | 3.37E+84                    | 0, 2.33E+264                   |
| Black Carbon       | 0.761                       | 0.07, 8.55                     |

**Web Table 2.** Estimates for the Association between an IQR Increase in Constituent Concentration and Ischemic Stroke Onset in the following 24 Hours and the Interaction between Constituent and PM<sub>2.5</sub>.

| Constituent | Model Term                     | Parameter Estimate | Standard Error | P     | IRR   | 95% CI       |
|-------------|--------------------------------|--------------------|----------------|-------|-------|--------------|
| Silicon     | PM <sub>2.5</sub>              | 0.171              | 0.083          | 0.04  | 1.187 | 1.008, 1.398 |
|             | Constituent                    | -0.046             | 0.105          | 0.66  | 0.955 | 0.778, 1.173 |
|             | PM <sub>2.5</sub> XConstituent | -0.013             | 0.040          | 0.74  | 0.987 | 0.912, 1.068 |
| Chlorine    | PM <sub>2.5</sub>              | 0.108              | 0.063          | 0.088 | 1.114 | 0.984, 1.260 |
|             | Constituent                    | -0.003             | 0.006          | 0.64  | 0.997 | 0.985, 1.009 |
|             | PM <sub>2.5</sub> XConstituent | 0.003              | 0.004          | 0.38  | 1.003 | 0.996, 1.011 |
| Potassium   | PM <sub>2.5</sub>              | 0.134              | 0.062          | 0.032 | 1.143 | 1.011, 1.291 |
|             | Constituent                    | 0.017              | 0.031          | 0.59  | 1.017 | 0.957, 1.080 |
|             | PM <sub>2.5</sub> XConstituent | -0.005             | 0.009          | 0.59  | 0.995 | 0.977, 1.013 |
| Manganese   | PM <sub>2.5</sub>              | 0.078              | 0.096          | 0.42  | 1.081 | 0.896, 1.305 |
|             | Constituent                    | -0.096             | 0.107          | 0.37  | 0.908 | 0.737, 1.120 |
|             | PM <sub>2.5</sub> XConstituent | 0.039              | 0.049          | 0.43  | 1.039 | 0.944, 1.144 |
| Zinc        | PM <sub>2.5</sub>              | 0.123              | 0.089          | 0.17  | 1.131 | 0.950, 1.347 |
|             | Constituent                    | -0.072             | 0.082          | 0.38  | 0.931 | 0.793, 1.093 |
|             | PM <sub>2.5</sub> XConstituent | 0.016              | 0.032          | 0.61  | 1.016 | 0.955, 1.081 |
| Sodium      | PM <sub>2.5</sub>              | 0.198              | 0.100          | 0.048 | 1.219 | 1.002, 1.483 |
|             | Constituent                    | -0.099             | 0.123          | 0.42  | 0.905 | 0.712, 1.151 |
|             | PM <sub>2.5</sub> XConstituent | -0.009             | 0.043          | 0.84  | 0.992 | 0.911, 1.079 |
| Copper      | PM <sub>2.5</sub>              | 0.117              | 0.065          | 0.073 | 1.124 | 0.989, 1.278 |
|             | Constituent                    | -0.020             | 0.073          | 0.78  | 0.980 | 0.849, 1.131 |
|             | PM <sub>2.5</sub> XConstituent | 0.008              | 0.023          | 0.73  | 1.008 | 0.964, 1.054 |
| Aluminum    | PM <sub>2.5</sub>              | 0.164              | 0.090          | 0.07  | 1.178 | 0.986, 1.406 |
|             | Constituent                    | -0.029             | 0.103          | 0.78  | 0.971 | 0.794, 1.188 |
|             | PM <sub>2.5</sub> XConstituent | -0.007             | 0.034          | 0.84  | 0.993 | 0.928, 1.062 |
| Calcium     | PM <sub>2.5</sub>              | 0.231              | 0.126          | 0.066 | 1.260 | 0.985, 1.613 |
|             | Constituent                    | 0.051              | 0.120          | 0.67  | 1.053 | 0.832, 1.331 |
|             | PM <sub>2.5</sub> XConstituent | -0.047             | 0.055          | 0.39  | 0.954 | 0.856, 1.063 |
| Bromine     | PM <sub>2.5</sub>              | 0.216              | 0.103          | 0.036 | 1.241 | 1.014, 1.517 |
|             | Constituent                    | 0.068              | 0.111          | 0.54  | 1.070 | 0.861, 1.330 |
|             | PM <sub>2.5</sub> XConstituent | -0.049             | 0.049          | 0.32  | 0.952 | 0.865, 1.048 |
| Lead        | PM <sub>2.5</sub>              | 0.136              | 0.086          | 0.11  | 1.146 | 0.969, 1.355 |
|             | Constituent                    | 0.014              | 0.108          | 0.89  | 1.014 | 0.821, 1.253 |

|              |                                |          |       |       |       |              |
|--------------|--------------------------------|----------|-------|-------|-------|--------------|
|              | PM <sub>2.5</sub> XConstituent | -0.007   | 0.045 | 0.87  | 0.993 | 0.909, 1.084 |
| Selenium     | PM <sub>2.5</sub>              | 0.082    | 0.074 | 0.27  | 1.085 | 0.939, 1.254 |
|              | Constituent                    | -0.026   | 0.082 | 0.75  | 0.974 | 0.830, 1.143 |
|              | PM <sub>2.5</sub> XConstituent | 0.026    | 0.031 | 0.4   | 1.027 | 0.966, 1.091 |
| Titanium     | PM <sub>2.5</sub>              | 0.156    | 0.092 | 0.089 | 1.169 | 0.977, 1.400 |
|              | Constituent                    | 0.064    | 0.127 | 0.62  | 1.066 | 0.830, 1.368 |
|              | PM <sub>2.5</sub> XConstituent | -0.024   | 0.046 | 0.61  | 0.977 | 0.892, 1.069 |
| Vanadium     | PM <sub>2.5</sub>              | 0.101    | 0.082 | 0.21  | 1.107 | 0.943, 1.299 |
|              | Constituent                    | 0.042    | 0.079 | 0.6   | 1.043 | 0.893, 1.218 |
|              | PM <sub>2.5</sub> XConstituent | -0.00001 | 0.031 | 1.000 | 1.000 | 0.941, 1.063 |
| Iron         | PM <sub>2.5</sub>              | 0.122    | 0.129 | 0.34  | 1.130 | 0.878, 1.455 |
|              | Constituent                    | 0.011    | 0.114 | 0.92  | 1.011 | 0.808, 1.265 |
|              | PM <sub>2.5</sub> XConstituent | -0.0002  | 0.053 | 1.000 | 1.000 | 0.902, 1.109 |
| Sulfur       | PM <sub>2.5</sub>              | 0.171    | 0.128 | 0.18  | 1.186 | 0.923, 1.524 |
|              | Constituent                    | 0.033    | 0.139 | 0.81  | 1.034 | 0.787, 1.359 |
|              | PM <sub>2.5</sub> XConstituent | -0.016   | 0.026 | 0.53  | 0.984 | 0.935, 1.035 |
| Nickel       | PM <sub>2.5</sub>              | 0.107    | 0.083 | 0.2   | 1.113 | 0.945, 1.310 |
|              | Constituent                    | 0.082    | 0.103 | 0.43  | 1.085 | 0.887, 1.328 |
|              | PM <sub>2.5</sub> XConstituent | -0.008   | 0.039 | 0.84  | 0.992 | 0.920, 1.070 |
| Black Carbon | PM <sub>2.5</sub>              | 0.020    | 0.122 | 0.87  | 1.020 | 0.804, 1.295 |
|              | Constituent                    | 0.186    | 0.126 | 0.14  | 1.205 | 0.942, 1.542 |
|              | PM <sub>2.5</sub> XConstituent | -0.003   | 0.045 | 0.94  | 0.997 | 0.913, 1.088 |

Abbreviations: CI, confidence interval; IRR, incidence rate ratio
